# Supplementary material for: MacB ABC Transporter Is a Dimer Whose ATPase Activity and Macrolide-binding Capacity Are Regulated by the Membrane Fusion Protein MacA
Source: PubMed Central journal article supplement — J Biol Chem. 2009 Jan 9;284(2):1145–54. doi: 10.1074/jbc.M806964200 (PMC2613632; doi:10.1074/jbc.m806964200), 2009-01-09

## Supplemental Data

### Methods

**Overexpression and purification of His-tagged *E. coli* proteins** - All the proteins used in this study were purified as fusion proteins with a six-histidine tag. The cells harboring plasmids were grown at 37°C in 2xYT media, with shaking at 220 rpm. When the cells density reached an OD<sub>600</sub> of 0.5, 0.2 to 0.5 mM IPTG was added, the temperature was adjusted to 25°C and cells left to overexpress proteins overnight. Cells were harvested by centrifugation at 4°C and resuspended in 20mM Tris-HCl buffer, 500 mM NaCl, pH 7.5, 10% v/v glycerol. Cell paste was added with complete protease inhibitor (Roche) and DNase I (Sigma) before be put through a Constant Systems cell disrupter (1x10 Kpsi and 1x25 Kpsi, model Z-plus 1.1kW, Constant Systems) twice for cell lyses. Cell debris were removed by centrifugation at 13,000 x g (15 mins at 4°C) and cell membranes were detained by ultracentrifugation at 125,000 x g (30 min at 4°C) for membrane proteins, while the supernatant was collected for soluble proteins. Membranes pellets were then dissolved in 20mM Tris-HCl buffer, 100 mM NaCl, pH 7.5, 10% v/v glycerol, 5% v/v Triton X-100 or 1% w/v βDDM.

***E. coli* MacB purification** - Membranes pellets were dissolved in 5% v/v Triton X-100 and MacB protein was purified under 0.2% v/v Triton X-100 by affinity chromatography using a Cu<sup>2+</sup> charged HiTrap chelating column (GE Healthcare). After desalting, MacB samples were subjected to ion exchange chromatography, using a HiTrap Q column (GE Healthcare) and eluted using a NaCl gradient.

***E. coli* MacA and Δ20-MacA purification** – MacA membrane pellets were dissolved in 5% v/v Triton X-100 and the MacA protein was purified under 0.2% v/v Triton X-100 by affinity chromatography using a HiTrap Ni<sup>2+</sup> -chelating column and desalted afterwards. Δ20-MacA was purified as described for MacA but without the addition of detergent.

***E. coli TolC purification*** – TolC was purified as described for the purification of MacA but with 1% w/v  $\beta$ DDM used to dissolve the membranes and 0.1% during the affinity-chromatography purification step.

**Detergent exchange** - MacB-TX-100 was mounted onto a HiTrap Q column and washed with 10 CV Tris HCl buffer, 10mM NaCl, 10% v/v glycerol, 0.2% w/v  $\beta$ DDM, pH 7.5 to remove TX-100 detergent. The column was then washed with an additional 2 CV with the same Tris-buffer containing 0.05% w/v  $\beta$ DDM. MacB- $\beta$ DDM was then eluted from the column with 100mM NaCl in the same buffer. For analytical ultracentrifugation (AUC) experiments we further lowered the  $\beta$ DDM concentration to 0.006% w/v. Under these conditions MacB was stable for over a week, allowing several datasets to be collected from a single sample.

**Quantification of  $\beta$ DDM bound to MacB** - A colorimetric assay was applied to quantify  $\beta$ DDM contribution in MacB- $\beta$ DDM complex [1]. MacB- $\beta$ DDM complex and processing buffer, 20mM Tris HCl, 50mM NaCl, 10% glycerol, with or without 0.2% w/v  $\beta$ DDM, pH 7.5, were collected from after a detergent exchange process and the buffer with  $\beta$ DDM served as blank for correction of background in absorbance measurements. MacB- $\beta$ DDM complex was diluted as necessary into the original purification buffer without  $\beta$ DDM to make a final volume of 60 $\mu$ L. The sample was first mixed with 300 $\mu$ L phenol (5% w/v), then carefully added with 720  $\mu$ L concentrated sulphuric acid and mixed well by vortexing with caps closed. The mixture was allowed to cool down at room temperature for 20 min and transferred to a cuvette for the absorbance measurements at 490nm using buffer with  $\beta$ DDM as a blank. A standard curve was generated using  $\beta$ DDM as a standard, and made by  $\beta$ DDM concentration ( $\mu$ g/60 $\mu$ L) plotting against the Abs<sub>490</sub> using linear regression. The molar ratio of protein to detergent was then calculated. We determined the amount of detergent bound by MacB solubilized in 0.05% w/v

$\beta$ DDM to be 1.2g  $\beta$ DDM/g MacB, which is equivalent to a  $\beta$ DDM:MacB molar ratio of 164: 1 and consistent with the values found for other membrane proteins [2]

**Analytical ultracentrifugation data analysis** - The buffer densities and partial specific volume of MacB were calculated with the program SEDNTERP [3] and using a partial specific volume of  $\beta$ DDM was 0.809 cm<sup>3</sup>/g [4]. The equilibrium data was analyzed using SEDPHAT [5].

**Atomic force microscopy** - The molecular volumes of the protein particles were determined from particle dimensions based on AFM images. After adsorption of the receptors onto the mica support, the particles adopt the shape of a spherical cap. The heights and half-height radii were measured from multiple cross-sections of the same particle, and the molecular volume was calculated by using the following equation:

$$V_m = (\pi h/6)(3r^2 + h^2) \quad (1)$$

where  $h$  is the particle height and  $r$  is the radius [6,7].

Molecular volume based on molecular mass was calculated by using the equation

$$V_c = (M_0/N_0)(V_1 + dV_2) \quad (2)$$

where  $M_0$  is the molecular mass,  $N_0$  is Avogadro's number,  $V_1$  and  $V_2$  are the partial specific volumes of particle and water, respectively, and  $d$  is the extent of protein hydration [6,7]. We used the value of 0.74 cm<sup>3</sup>/g for the partial specific volumes of protein [7], and 0.4 g of water per g of protein for the extent of protein hydration [8]. Using automated recognition of proteins [9, 10], it was calculated the molecular volume of isolated particles as described above.

**ATPase activity** - An EnzChek phosphate assay kit (Molecular Probes, Invitrogen) was used to determine the ATPase activity of MacB hydrolyzing ATP to release phosphate. The reaction mixture contained 20 mM Tris-HCl (pH 7.5), 50mM NaCl, 6mM MgCl<sub>2</sub>, MESG substrate and purine nucleoside phosphorylase. The A<sub>360</sub> absorbance change was measured, after initiating the reaction by mixing protein with ATP, using a stopped flow spectrometer (PiStar-180 spectrometer, Applied Photophysics) at 25°C. A calibration curve, generated using KH<sub>2</sub>PO<sub>4</sub> as a standard, was constructed by plotting the quantity of phosphate (nmoles) against the Abs<sub>360</sub> of MESG. In control experiments in which the MgCl<sub>2</sub> was omitted, there was no ATPase activity.

The time course data for the production of inorganic phosphate (Pi) by MacB was analysed by fitting the trace, by non-linear regression, to an exponential function with a steady-state (e.g.  $Abs = A_{(burst)}\exp(-k_b t) + k_{ss}t$ ), to give the rate ( $k_b$ ) and amplitude ( $A_{burst}$ ) of the Pi burst phase and steady-state rate ( $k_{ss}$ ) of Pi production. In the presence of MacA, which prevented the Pi-burst by MacB, the traces were analysed by fitting the data to a linear function to give the steady-state rate of Pi production. The steady-state data for the rate of Pi release as a function of the ATP concentration was analysed by fitting the data points, by non-linear regression, to a hyperbolic function to yield values for  $V_{max}$  and  $K_m$ .

**Equilibrium binding of [<sup>14</sup>C]-erythromycin to affinity-purified Mac proteins** – For equilibrium binding of erythromycin to purified Mac proteins, 50 µg of purified MacA or MacB, or 25 µg MacA plus 25 µg MacB were incubated for 30 min in the presence of fixed concentrations of 1, 5 or 10 µM [N-methyl-<sup>14</sup>C]-erythromycin (48.8 mCi/mmol, Perkin Elmer Life sciences, USA). The incubation was carried out in glass tubes in a final volume of 500 µl of 10 mM Tris-HCl (pH 7.4) containing 0.05% w/v DDM. The samples were incubated at room temperature in the dark, and rapidly filtered through 0.22 µm nitrocellulose filters (Whatmann), which were pre-equilibrated for 5 h in wash buffer (ice-cold 10 mM Tris-HCl (pH 7.4) supplemented with 150 mM KCl and 5 mM

MgCl<sub>2</sub>). The filters were washed once with 3 ml of wash buffer. Subsequently, filter-retained radioactivity was measured by liquid scintillation counting using the scintillant Ultima Gold XR (Perkin Elmer Life Sciences, USA). Non-specific binding to MacB (less than 30% of total binding) was determined as the amount of [<sup>14</sup>C]-erythromycin bound to half molar quantities of 12 trans-membrane helix-containing sugar transporter GalP [11,12], and was subtracted.

### Supplemental Figure Legends

**Fig. 1 - MacA sequence alignment.** A sequence alignment of the MacA membrane fusion proteins from the Gram-negative bacterium *E. coli* and Gram-positive bacteria *S. epidermitis* and *S.aureus* respectively. This analysis indicates that while the proteins from *E. coli* and *S. epidermitis* have similar secondary structures, the large  $\alpha$ -helical domain predicted to harbor the TolC interaction site is missing in the *S. aureus* protein. Alignments were performed using T-Coffee and ClustalW2 server. Secondary structure prediction is a summary of PHD, PROFsec and JPred secondary structure predictions with probability weighting as implicated in PredictProtein/MetaPP server [13]. Results were visualized using ESPript [14].

**Fig. 2 – (A) Chemical cross-linking indicates that MacA interacts with MacB.** The chemical cross-linker DMS (dimethyl-suberimidate; 11.0 Å spacer arm) was added to MacA, MacB, and a mixture of the two proteins, and the cross-linked products analysed by SDS-PAGE. The lanes of the gel were loaded with the following samples: MacA + 5mM DMS (lane 1); MacB + 5mM DMS (lane 2); MacB + MacA +5mM DMS 1 h (lane 3); MacB+ 5 mM DMS 30 min + MacA (another 30 min) (lane 4). A novel band, shown within a box, was identified, which was subsequently found to contain both by MacA and MacB when analysed by MALDI-TOF in-gel analysis. The right hand panels show the MacB and MacA sequences and oligopeptides identified by MALDI-TOF mass spectrometry are indicated in red. In control lanes only MacB or MacA could be identified by MALDI in-gel analyses (data not shown). **(B) Chemical cross-linking indicates that MacB forms dimers.** The MacB protein

was mixed with increasing concentrations of the chemical cross-linker DSP (dithiobis(succinimidyl)-propionate; 12.0 Å spacer arm) and the cross-linked products analysed by SDS-PAGE. In addition to the band corresponding to the monomer, with a Mr between 60-70 kDa, the most predominant band, which increased in intensity with the DMS concentration, ran between the 120 kDa and 160 kDa markers, indicative of a dimer. However, there were several higher-Mr bands also present that would suggest that the protein can form higher-order oligomers.

## References

1. Butler PJ, Ubarretxena-Belandia I, Warne T, Tate CG (2004) The *Escherichia coli* multidrug transporter EmrE is a dimer in the detergent-solubilised state. *J Mol Biol.* 340:797-808
2. Ravaud S, Do Cao MA, Jidenko M, Ebel C, Le Maire M, Jault JM, Di Pietro A, Haser R, Aghajari N. (2006) The ABC transporter BmrA from *Bacillus subtilis* is a functional dimer when in a detergent-solubilized state. *Biochem J.* 395:345-53
3. Laue TM, Shah BD, Ridgeway TM, Pelletier SL. Computer-aided interpretation of analytical sedimentation data for proteins in: *Analytical ultracentrifugation in Biochemistry and polymer science* (Harding, S.E., Rowe, A. J. and Horton eds) pp 90-125, The Royal Society of Chemistry, Cambridge, UK.
4. Peterson GL, Rosenbaum LC, Schimerlik MI. Solubilization and hydrodynamic properties of pig atrial muscarinic acetylcholine receptor in dodecyl β-D-maltoside. *Biochem J.* (1988) 255: 553-60
5. Vistica J, Dam J, Balbo A, Yikilmaz E, Mariuzza RA, Rouault TA, Schuck P. (2004) Sedimentation equilibrium analysis of protein interactions with global implicit mass conservation constraints and systematic noise decomposition. *Analytical Biochemistry* 326: 234-256

6. Barrera NP, Herbert P, Henderson RM, Martin IL, Edwardson JM. (2005) Atomic force microscopy reveals the stoichiometry and subunit arrangement of 5-HT<sub>3</sub> receptors. *Proc Natl Acad Sci U S A*. 102: 12595-12600.
7. Schneider SW, Lärmer J, Henderson RM, Oberleithner H. (1998) Molecular weights of individual proteins correlate with molecular volumes measured by atomic force microscopy. *Pflugers Arch*. 435: 362-367.
8. Grant EH. (1957) The dielectric method of estimating protein hydration *Phys Med Biol*. 2: 17-28.
9. Barrera NP, Henderson RM, Edwardson JM. (2008) Determination of the architecture of ionotropic receptors using AFM imaging. *Pflugers Arch*. 456:199-209
10. Barrera NP, Ge H, Henderson RM, Fitzgerald WJ, Edwardson JM. (2008). Automated analysis of the architecture of receptors, imaged by atomic force microscopy. *Micron* 39, 101-110.
11. Bapna A, Federici L, Venter H, Velamakanni S, Luisi B, Fan TP, van Veen HW. (2007) Two proton translocation pathways in a secondary active multidrug transporter. *J. Mol. Microbiol. Biotechnol*. 12:197-209
12. Velamakanni S, Janvilisri T, Shahi S, van Veen HW. (2008) A functional steroid-binding element in an ATP-binding cassette multidrug transporter. *Mol Pharmacol*. 73: 12-17.
13. Rost B, Yachdav G, Liu J. (2004) The PredictProtein Server. *Nucleic Acids Research* 32(Web Server issue):W321-W326.
14. Gouet P, Courcelle E, Stuart DI, Metz F. (1999) ESPript: multiple sequence alignments in PostScript. *Bioinformatics*. 15:305-8
15. Miroux B, Walker J. (1996) Over-production of proteins in *Escherichia coli* mutant hosts that allow synthesis of some membrane proteins and globular proteins. *J. Mol Biol*. 260:289-98

- 16.** Morita Y, Kodama K, Shiota S, Mine T, Kataoka A, Mizushima T, Tsuchiya T. (1998)  
NorM, a putative multidrug efflux protein, of *Vibrio parahaemolyticus* and its homolog in  
*Escherichia coli*. *Antimicrob Agents Chemother.* 42:1778-82



**TABLE 1: Strains and plasmids**

| <i>Strains/plasmids</i>            | <i>Description</i>                                                                                                                                                                                                                                                                                                                                                                                                                          | <i>Source</i> |
|------------------------------------|---------------------------------------------------------------------------------------------------------------------------------------------------------------------------------------------------------------------------------------------------------------------------------------------------------------------------------------------------------------------------------------------------------------------------------------------|---------------|
| <b><i>E. coli</i> strains</b>      |                                                                                                                                                                                                                                                                                                                                                                                                                                             |               |
| NovaBlue                           | Source of DNA for PCR amplification of <i>macAB</i> and <i>tolC</i> genes – <i>recA1 endA1 gyrA96 thi-1 hsdR17 supE44 relA1 lac</i> [F' <i>proAB lacI<sup>q</sup>ZΔM15 Tn10(Tet<sup>r</sup>)</i> ]                                                                                                                                                                                                                                          | Novagen       |
| C43(DE3)                           | Expression host for pET vectors - F- <i>ompT hsdS<sub>B</sub> (r<sub>B</sub>-m<sub>B</sub>-) gal dcm</i> (DE3)                                                                                                                                                                                                                                                                                                                              | 15            |
| Kam3(DE3)                          | Antibiotic sensitive host strain used for expression of pDuet vectors - <i>ΔacrAB</i>                                                                                                                                                                                                                                                                                                                                                       | 16            |
| <b>Plasmid cloning vectors</b>     |                                                                                                                                                                                                                                                                                                                                                                                                                                             |               |
| pET21                              | Expression of His-tagged proteins in <i>E. coli</i>                                                                                                                                                                                                                                                                                                                                                                                         | Novagen       |
| pET28                              | Expression of His-tagged proteins in <i>E. coli</i>                                                                                                                                                                                                                                                                                                                                                                                         | Novagen       |
| pET45                              | Expression of S-tagged proteins in <i>E. coli</i>                                                                                                                                                                                                                                                                                                                                                                                           | Novagen       |
| pET-Duet                           | Simultaneous expression of two proteins in <i>E. coli</i>                                                                                                                                                                                                                                                                                                                                                                                   | Novagen       |
| pBAD/gIII                          | Expression of His-tagged proteins that are secreted into the periplasm of <i>E. coli</i>                                                                                                                                                                                                                                                                                                                                                    | Invitrogen    |
| <b>Plasmid constructs</b>          |                                                                                                                                                                                                                                                                                                                                                                                                                                             |               |
| pET-macB                           | <i>E. coli macB</i> cloned into pET28a(+) using NdeI-macB Forward and SacI-stop-macB Reverse primers                                                                                                                                                                                                                                                                                                                                        | This study    |
| pET-macA                           | <i>E. coli macA</i> cloned into pET21d(+) using NcoI-macA Forward and XhoI-macA Reverse primers                                                                                                                                                                                                                                                                                                                                             | This study    |
| pET-Δ20macA                        | <i>E. coli macA</i> mutant, encoding a derivative truncated at position 20, cloned into pET21d(+) using NcoI-FD20-macA Forward and XhoI-macA Reverse primers                                                                                                                                                                                                                                                                                | This study    |
| pET-tolC                           | <i>E. coli tolC</i> double mutant, Y362F,R367D, encoding residues 1-450 of TolC in the open-state, cloned into pET21a(+) using NdeI-tolC Forward and XhoI-RD43tolC Reverse primers                                                                                                                                                                                                                                                          | This study    |
| pET-Duet-macB                      | <i>E. coli macB</i> cloned into MCS1 of pET-Duet, using EcoRI-macB Forward and SalI-stop-macB Reverse primers.                                                                                                                                                                                                                                                                                                                              | This study    |
| pET-Duet-macB/macA                 | <i>E. coli macBmacA</i> cloned into MCS1 of pET-Duet using using EcoRI-macB Forward, SalI-stop-macB Reverse, and SalI-SD-macA Forward, NotI-stop-T7tag-macA Reverse primer, respectively.                                                                                                                                                                                                                                                   | This study    |
| pET-Duet-macB/tolC                 | <i>E. coli macB</i> and <i>tolC</i> cloned into MCS1 and MCS2 of pET-Duet, using EcoRI-macB Forward, SalI-stop-macB Reverse, and NdeI-tolC Forward, XhoI-RD43tolC Reverse primers, respectively.                                                                                                                                                                                                                                            | This study    |
| pET-Duet-macB/macA/tolC            | <i>E. coli macBmacA</i> cloned into MCS1 and <i>tolC</i> into MCS2 of pET-Duet for drug susceptibility testing, using EcoRI-macB Forward, SalI-stop-macB Reverse, SalI-SD-macA Forward, NotI-stop-T7tag-macA Reverse, and NdeI-tolC Forward, XhoI-RD43tolC Reverse primers, respectively.                                                                                                                                                   | This study    |
| pET-Duet-macB/gIII-SS-Δ20macA/tolC | <i>E. coli macB</i> and <i>Δ20macA</i> , bearing an N-terminal gIII signaling sequence, cloned into MCS1 and <i>tolC</i> into MCS2 of pET-Duet for drug susceptibility testing. This was achieved by ligating a NcoI- <i>Δ20macA</i> -XhoI fragment into pBAD/gIII; a SalI-geneIII SS- <i>Δ20MacA</i> -T7tag-stop-NotI fragment was then raised with SalI-SD-gIII Sequence Forward, NotI-stop-T7tag-macA Reverse and ligated into pET Duet. | This study    |
| pET-macA (S-tag)                   | <i>E. coli macA</i> cloned into pET45b(+) using NcoI-macA Forward and XhoI-macA Reverse primers                                                                                                                                                                                                                                                                                                                                             | This study    |
| pET-tolC (S-tag)                   | <i>E. coli tolC</i> cloned into pET45b(+) using NcoI-tolC Forward and XhoI-RD43tolC Reverse primers                                                                                                                                                                                                                                                                                                                                         | This study    |

**TABLE 2: Primers**

| <i>Primers</i>                |                                                                                                                                       |
|-------------------------------|---------------------------------------------------------------------------------------------------------------------------------------|
| NdeI-macB Forward             | <b>CAT ATG</b> ACG CCT TTG CTC GAA TTA AAG GAT                                                                                        |
| SacI-stop-macB Reverse        | <b>GAG CTC</b> <u>TCA</u> CTC TCG TGC CAG AGC ATC TAC                                                                                 |
| NcoI-macA Forward             | <b>CCA TGG</b> GA GCA TAT GGA GTA TTC AGA AAA TTT                                                                                     |
| XhoI-macA Reverse             | <b>CTC GAG</b> TTG TGC AGC TCC TGG TTT GGC CTC                                                                                        |
| NcoI-FD20-macA Forward        | <b>CCA TGG</b> GA GGA CTG ATT ACG TTA TGG AGA ATT                                                                                     |
| XhoI-macA Reverse             | <b>CTC GAG</b> TTG TGC AGC TCC TGG TTT GGC CTC                                                                                        |
| NdeI-tolC Forward             | <b>CAT ATG</b> AAG AAA TTG CTC CCC ATT CTT ATC                                                                                        |
| NcoI-tolC Forward             | <b>CCA TGG</b> GA AAG AAA TTG CTC CCC ATT CTT ATC                                                                                     |
| XhoI-RD43tolC Reverse         | <b>CTC GAG</b> TTC CGG ATT AGT GGA AAC CGG TTT                                                                                        |
| EcoRI-macB Forward            | <b>GAA TTC</b> G ACG CCT TTG CTC GAA TTA AAG GAT                                                                                      |
| SalI-stop-macB Reverse        | <b>GTC GAC</b> <u>TCA</u> CTC TCG TGC CAG AGC ATC TAC                                                                                 |
| SalI-SD-macA Forward          | <b>GTC GAC</b> GAG GAA TAA TAA ATG GCA TAT GGA GTA TTC AGA AAA                                                                        |
| NotI-stop-T7tag-macA Reverse  | <b>GCGG CCGC</b> <u>TCA</u> ACC CAT TTG CTG TCC ACC AGT CAT GCT AGC CAT TTG TGC<br>AGC TCC TGG TTT GGC CTC ACC AAT CAC CAC TTC ATC GC |
| NdeI-tolC Forward             | <b>CAT ATG</b> AAG AAA TTG CTC CCC ATT CTT ATC                                                                                        |
| XhoI-RD43tolC Reverse         | <b>CTC GAG</b> TTC CGG ATT AGT GGA AAC CGG TTT                                                                                        |
| SalI-SD-gIII Sequence Forward | <b>GTC GAC</b> GAG GAA TAA TAA ATG AAA AAA CTG CTG TTC GCG ATT                                                                        |
| NotI-stop-T7tag-macA Reverse  | <b>GCGG CCGC</b> <u>TCA</u> ACC CAT TTG CTG TCC ACC AGT CAT GCT AGC CAT TTG TGC<br>AGC TCC TGG TTT GGC CTC ACC AAT CAC CAC TTC ATC GC |

Notes: **Bolded** sequences indicate restriction endonuclease sites. Underlined sequences indicate stop codons incorporated to prevent addition of vector sequences into the transcription.

# Supplementary Figure 1.

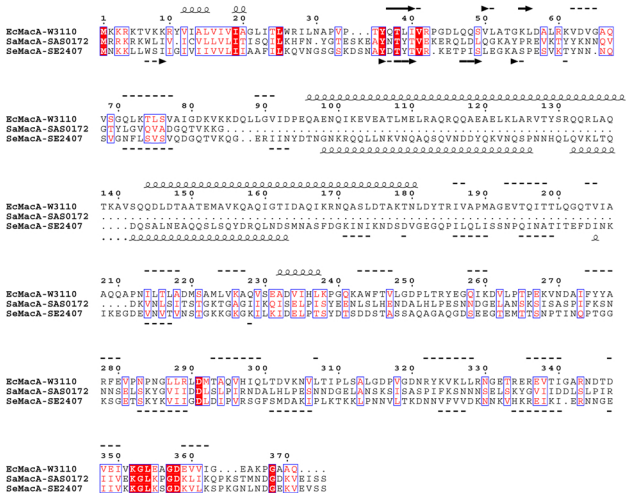

## Supplementary Figure 2.

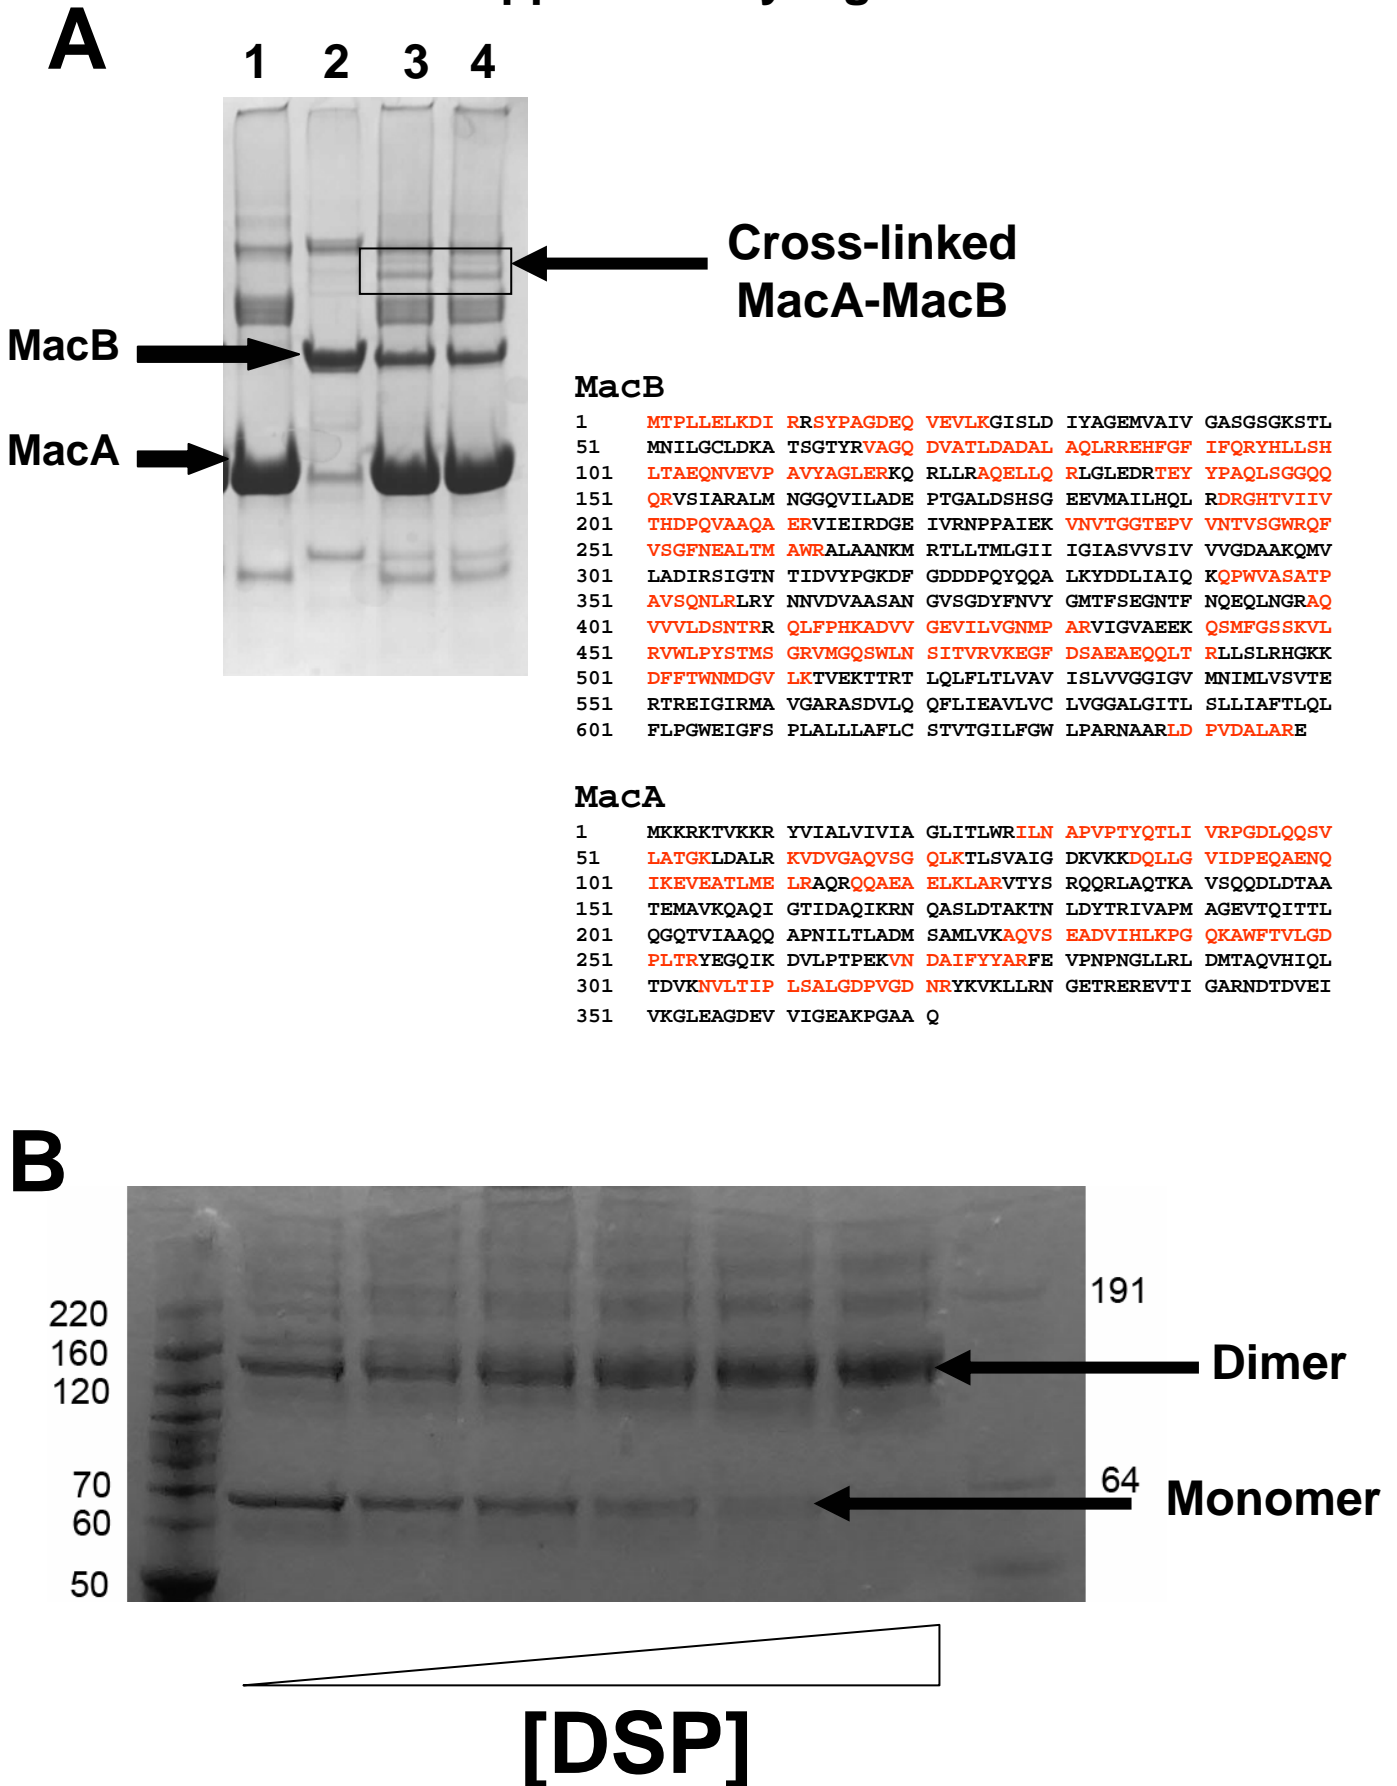

Supplement: M806964200_1.pdf [file M806964200_1.pdf]
